# Supplementary material for: Extracellular Vesicles from Thapsigargin-Treated Mesenchymal Stem Cells Ameliorated Experimental Colitis via Enhanced Immunomodulatory Properties
Source: PubMed Central journal article supplement (PMC7922639; doi:10.3390/biomedicines9020209), 2021-02-18

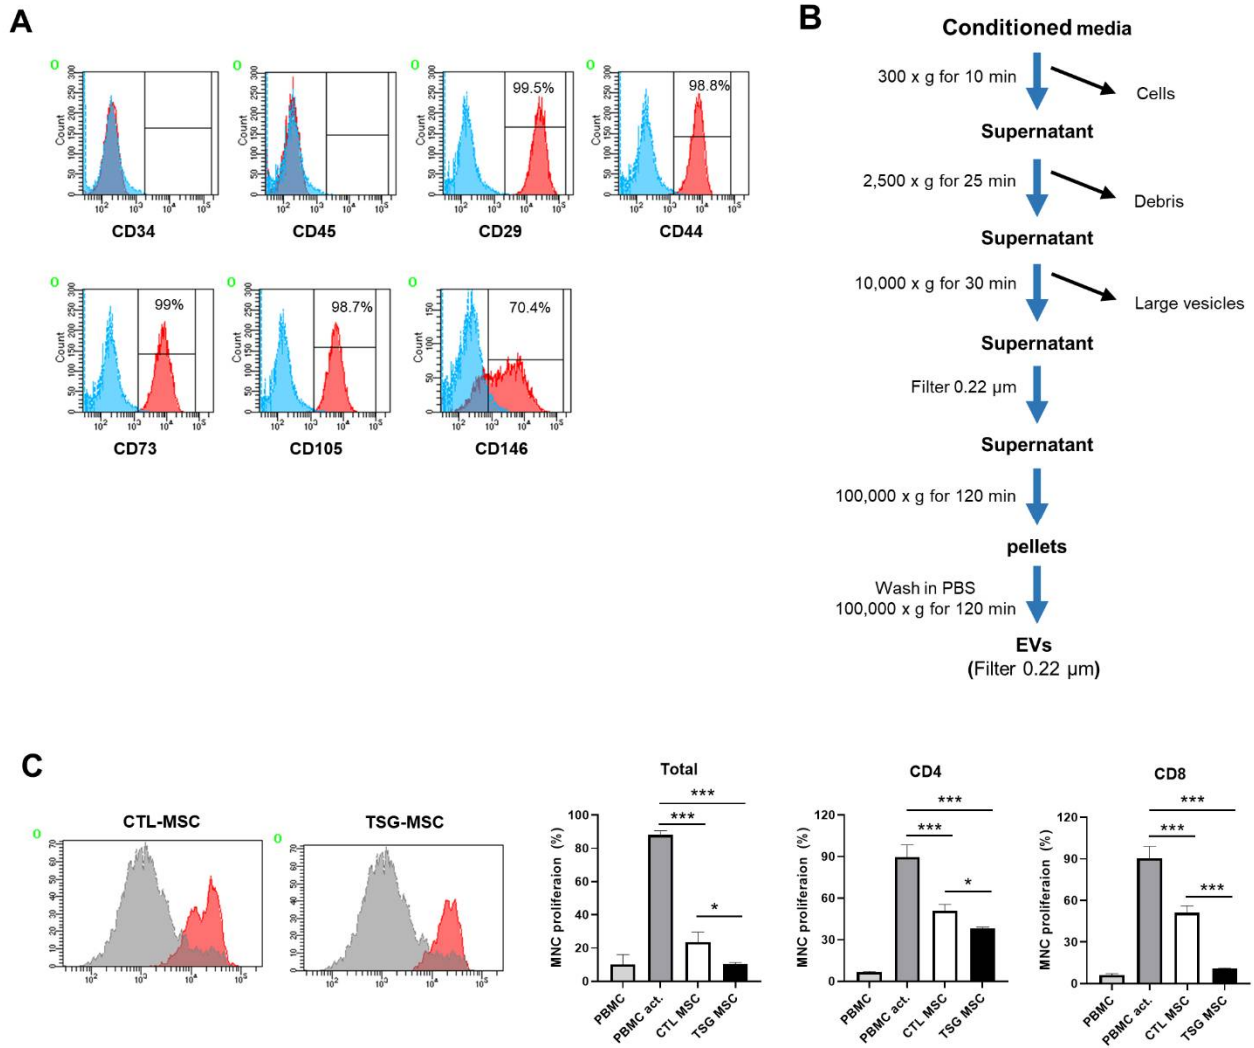

**Figure S1.** Characterization of WJ-MSCs and isolation of EVs. **(A)** Cell surface markers of WJ-MSCs were measured by flow cytometry for the expression of the MSCs specific antigen CD29, CD44, CD73, CD105, CD146 and CD34, CD45. **(B)** Scheme of the ultracentrifugation-based EV isolation. **(C)** CTL-MSCs and TSG-MSCs were co-cultured with CFSE-labeled PBMCs in the presence of anti-CD3/CD28 beads and IL-2. After 6 days, proliferation of T cell was measured by flow cytometry analysis. The data are shown as the mean ± S.D. of three independent experiments (\*  $p < 0.05$ , \*\*\*  $p < 0.001$ ).

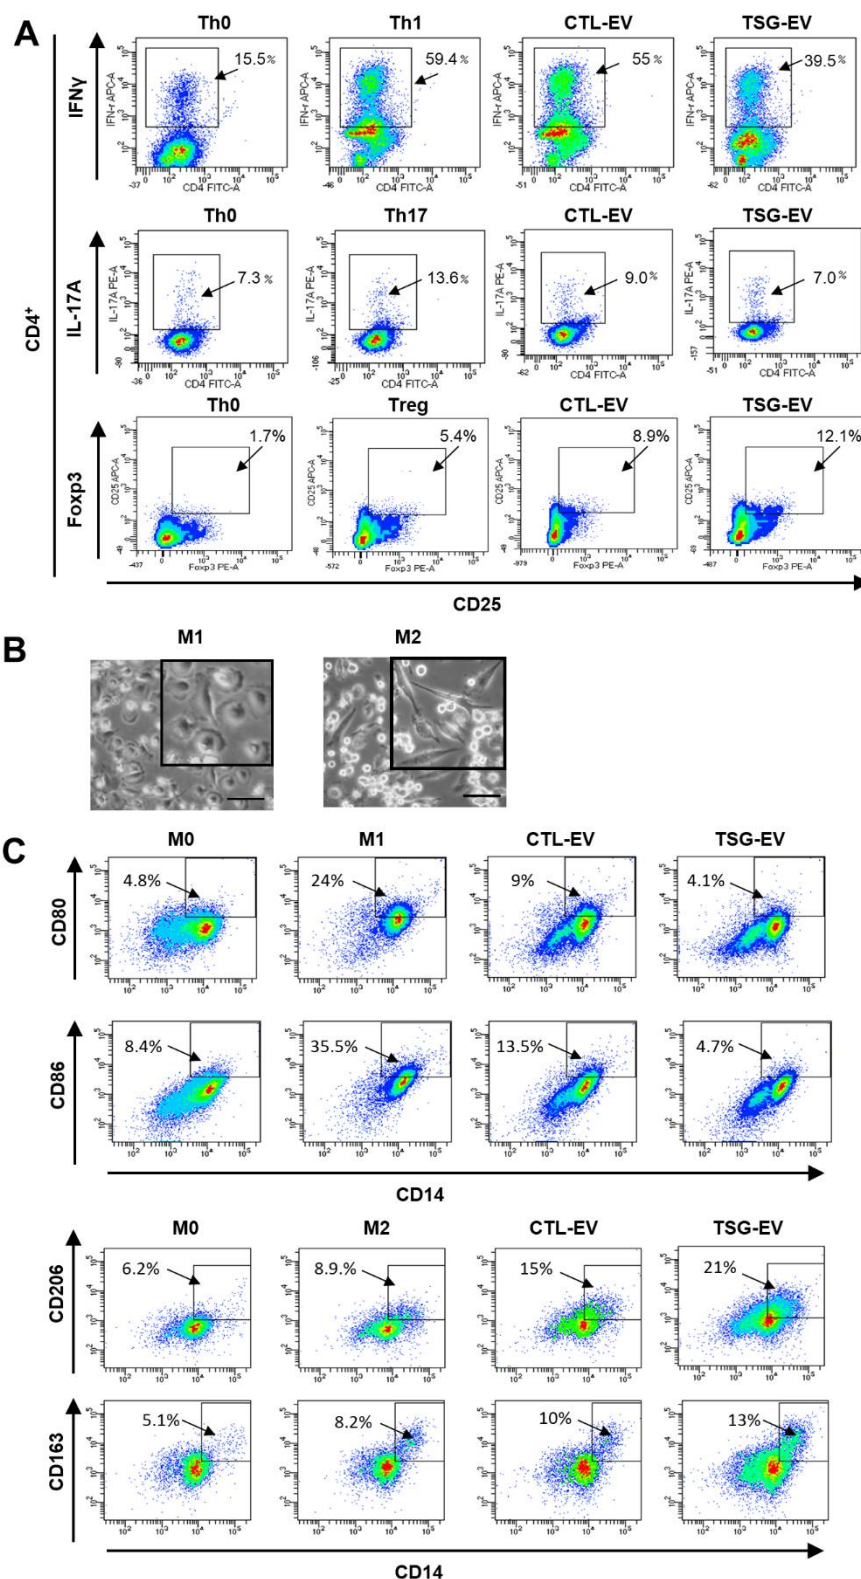

**Figure S2.** EVs from TSG-primed WJ-MSCs regulate T helper (Th) cell differentiation and macrophage polarization. (A) CD4<sup>+</sup> T cells were incubated with specific lineage-driving cytokines with or without EVs derived from naive or TSG primed WJ-MSCs in the presence of anti-CD3/CD28 beads and IL-2 for 5 days. The percentage of Th1, Th17 and Treg cells were analyzed by flow cytometry. (B,C) GM-CSF or M-CSF-induced macrophages were activated with either the M1 cytokines or M2 cytokines for 48 h. (B) Representative images of M0, M1, and M2. Scale bar, 100  $\mu$ m. (C) Expression of M1 and M2 macrophage surface markers were analyzed by flow cytometry.

**Table S1.** Sequences of PCR primers used in this study.

| Gene            | Forward (5'→3')         | Reverse (5'→3')          |
|-----------------|-------------------------|--------------------------|
| hCOX2           | AGACGCCCTCAGACAGCAAA    | TCCTGTCCGGGTACAATCGC     |
| hIDO            | CCTGAGGAGCTACCATCTGC    | TCAGTGCCTCCAGTTCCTTT     |
| hIFN $\gamma$   | GAGTGTGGAGACCATCAAGGAAG | TGCTTTGCGTTGGACATTCAAGTC |
| hIL-10          | TCTCCGAGATGCCTTCAGCAGA  | TCAGACAAGGCTTGCCAACCCA   |
| hIL-1 $\beta$   | CTCTTCGAGGCACAAGGCAC    | CAAGTCATCCTCATTGCCACTGT  |
| hNOS2           | GCTCTACACCTCCAATGTGACC  | CTGCCGAGATTTGAGCCTCATG   |
| hTGFB $\beta$   | GATGTCACCGGAGTTGTGCG    | GCCGGTAGTGAACCCGTTGAT    |
| hTNF $\alpha$   | CTCTTCTGCCTGCTGCACTTTG  | ATGGGCTACAGGCTTGTCACTC   |
| hRab27a         | GAAGCCATAGCACTCGCAGAGA  | CAGGACTTGTCCACACACCGTT   |
| hRab27b         | TGGCAACAAGGCAGACCTACCA  | CTCCACATTCTGTCCAGTTGCTG  |
| hRab7           | GTGATGGTGGATGACAGGCTAG  | AGTCTGCACCTCTGTAGAAGGC   |
| hRab11          | ACCCAGCTCTCGATCTCTT     | ACATTTTCAGTAACGGGCGGG    |
| hRab35          | CAGCCCATCTTACTGCAAGCAG  | GCTGACAACCTGTCCGAGAGAA   |
| hSNARE          | CTGTTAGAGCGAGGTGAGAAGC  | GATGGTGCCATTCCAGCATTGG   |
| mArg1           | CTGCCAAAGACATCGTGTAC    | CTTCCATCACCTTGCCAATC     |
| mCD206          | GCAAAGAGAAGGAAACCATG    | CCAATAAAATATGGTGAAGTCCC  |
| mCXCL9          | GTTGTCCACCTCCCTTCGGT    | CCAGCTGTCAGATGCAAGGG     |
| mFoxp3          | TTGGCCAGCGCCATCTT       | TGCCTCCTCCAGAGAGAAGTG    |
| mGATA3          | GATCCAGCACAGAAGGCAGG    | CGCTTGGGCTTGATAAGGGG     |
| miNOS           | GAGACAGGGAAGTCTGAAGCAC  | CCAGCAGTAGTTGCTCCTCTTC   |
| mMCP1           | CTGGAGCATCCACGTGTGG     | TCCTTCTTGGGGTCAGCACAG    |
| mROR $\gamma$ t | GAAGGCAAATACGGTGGTGTGG  | GCTGAGGAAGTGGGAAAAGTC    |
| mT-bet          | TTCCCAGCCGTTTCTACCCC    | CGTCTTGGCCCCGGTAGTAG     |

**Original image corresponding to Figure 1B.**

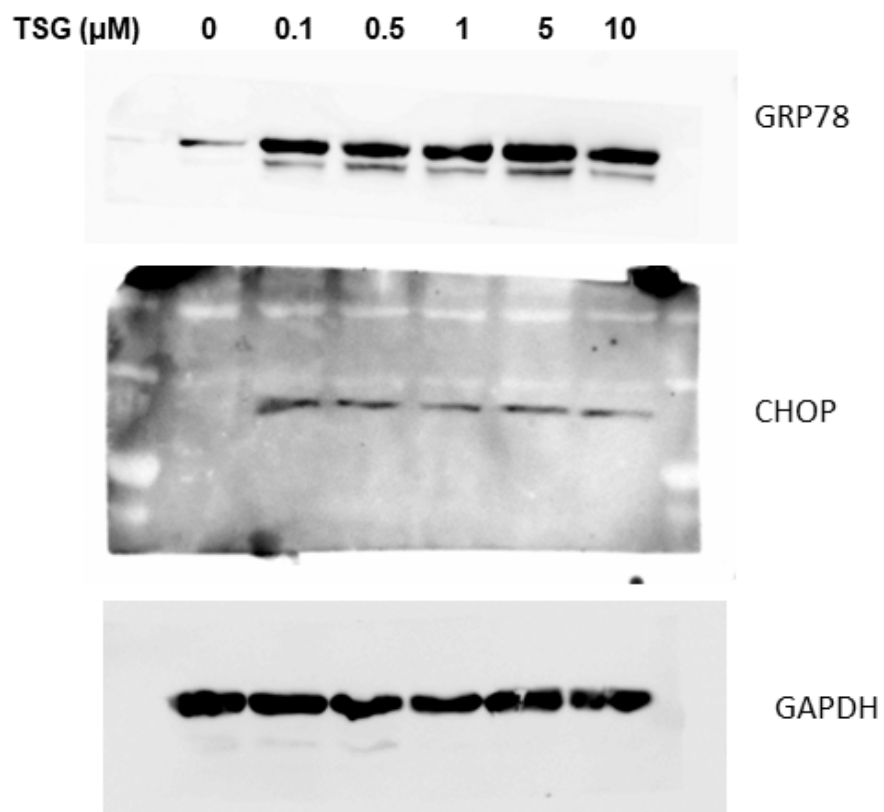

**Original image corresponding to Figure 1E.**

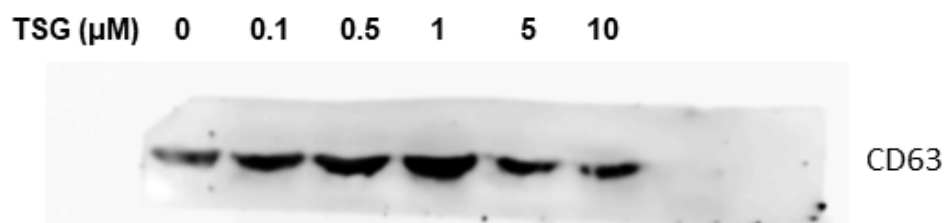

**Original image corresponding to Figure 2B.**

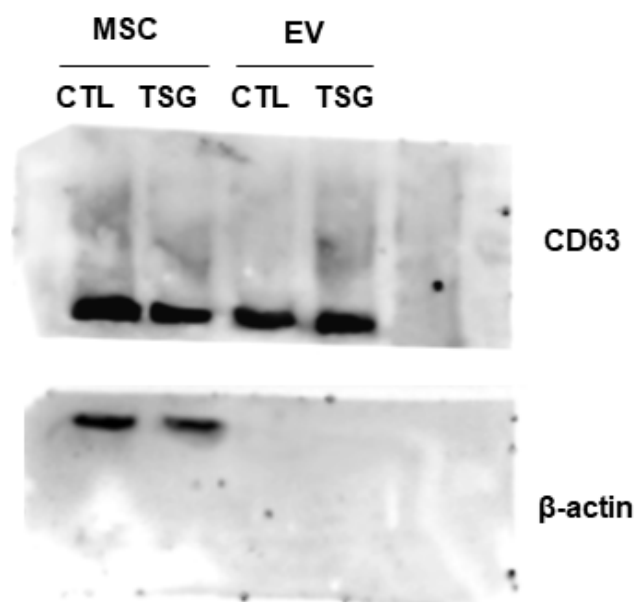

**Original image corresponding to Figure 2E.**

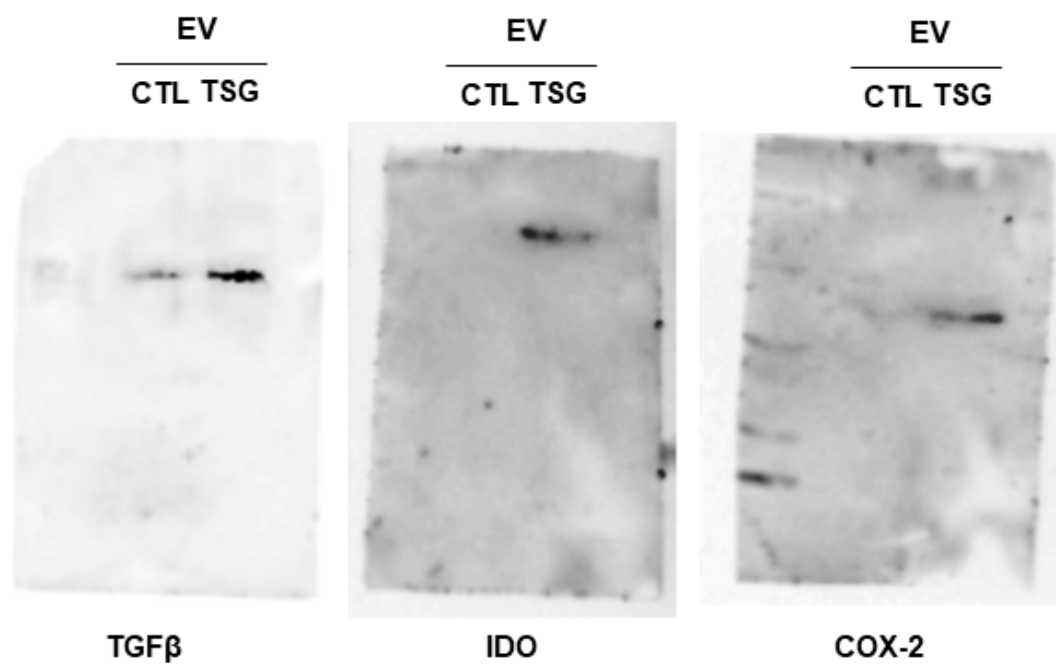

Supplement: biomedicines-09-00209-s001.pdf [file biomedicines-09-00209-s001.pdf]
